# Supplementary material for: Increased hippocampal TrkA expression ameliorates cranial radiation-induced neurogenesis impairment and cognitive deficit via PI3K/AKT signaling
Source: PubMed Central journal article supplement — Oncol Rep. 2020 Sep 28;44(6):2527–36. doi: 10.3892/or.2020.7782 (PMC7640353; doi:10.3892/or.2020.7782), 2020-09-28

Figure S1. Intrahippocampal infusion of AAV8 encoding GFP. (A) Representative confocal microscopy images at a magnification of x10. (B) The magnified image. The arrow and rectangular box indicate the injection site. AAV, adeno-associated virus; GFP, green fluorescent protein.

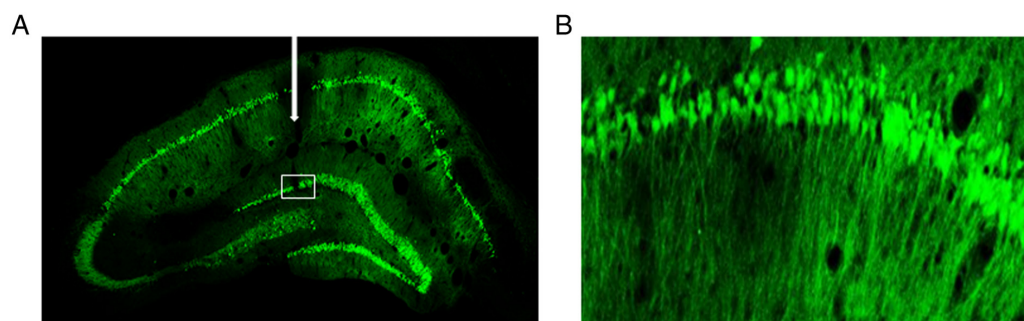

Figure S2. Effect of AAV-ovp-TrkA on cognition in normal rats. (A and B) Western blot analysis of TrkA protein levels between rats in the control group and AAV-ovp-TrkA group. (C) Escape latency in Morris Water Maze between the control group and AAV-ovp-TrkA group. Data are presented as the mean  $\pm$  SEM. \* $P < 0.05$ . AAV, adeno-associated virus; ctl, control; TrkA, tropomyosin receptor kinase A; ovp, overexpressing.

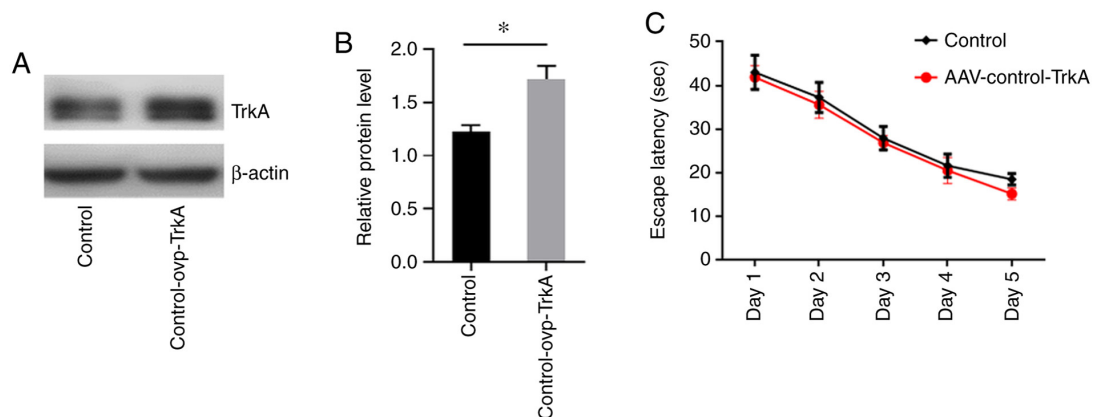

Figure S3. Escape latency in Morris Water Maze between the irradiation group and AAV-irradiation group. There was no difference between the treatment of irradiation and only AAV injection. The two-way ANOVA was used to access the difference between the two treatments. AAV, adeno-associated virus.

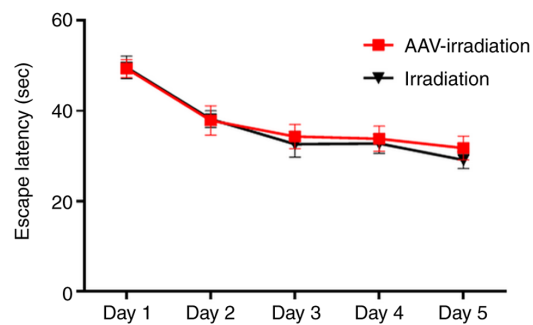

Supplement: Supplementary_Data.pdf [file Supplementary_Data.pdf]
